# Supplementary material
Source: Springer Nature journal article supplement (https://www.springermedizin.de/resource/supplementary/12875_2013_1056_MOESM1_ESM.pdf/9436064)
Supplement: MOESM1 [file 9436064]

Invited in participating the study: GPs of all teaching practices of the Department of General practice/University of Halle in 2012

n = 92

**First study arm**

**Interest in participation:**  
delivery of the study documents "responder"  
n = 29 (32 %)

**Dropouts**  
(no return or no documentation)  
n = 8

**Participants:**  
documentation of home visits  
n = 21

**Invited for telephone interviews:** evaluation of study design and questionnaire

**Participants in evaluation of study design**  
n = 22

**Non-participants in evaluation of study design**  
n = 7

**Second study arm**

**No interest in participation** "non-responder"  
n = 63 (69 %)

**Invited for telephone interviews:** non-response analysis

**Participants in non-response analysis**  
n = 20

**Non-participants in non-response analysis**  
n = 43
